# Supplementary material for: In vaccinated individuals serum bactericidal activity against B meningococci is abrogated by C5 inhibition but not by inhibition of the alternative complement pathway
Source: Frontiers journal article supplement (doi:10.3389/fimmu.2023.1180833), 2023-06-29
Supplement: Data_Sheet_1.PDF [file Data_Sheet_1.PDF]

## *Supplementary Material*

# **In vaccinated individuals serum bactericidal activity against B meningococci is abrogated by C5 inhibition but not by inhibition of the alternative complement pathway**

Emma Ispasanie, Lukas Muri, Marc Schmid, Anna Schubart, Christine Thorburn, Natasa Zamurovic, Thomas Holbro, Michael Kammüller, and Gerd Pluschke\*

\* **Correspondence:** Gerd Pluschke: [Gerd.Pluschke@swisstph.ch](mailto:Gerd.Pluschke@swisstph.ch)

## **1 Supplementary Data**

## 2 Supplementary Figures and Tables

**Supplementary Table 1. Summary of the average SBA titers of the human serum samples of subjects vaccinated with the MenB-4C vaccine Bexsero.** SBA titers are the reciprocal dilutions of serum that result in 50% killing of the bacteria after 60 minutes incubation. A lack of SBA is indicated with the number 2 to indicate SBA titers below detection limit. The lowest serum dilution tested was 1:5. Abbreviations: pre vaccination serum sample (Pre), 2 weeks post booster (wPB), 2 months post-booster (mPB), 6 months post-booster (6mPB), 2 months post-dose 1 (mPD 1), 2 weeks post-dose 2 (wPD 2) and 6 months post-dose 2 (6mPD 2).

|       | Subjects | 2   |     |     |      | 3   |       |       |        | 11  |       |       |        | 12  |       |       |        |
|-------|----------|-----|-----|-----|------|-----|-------|-------|--------|-----|-------|-------|--------|-----|-------|-------|--------|
|       |          | Pre | wPB | mPB | 6mPB | Pre | mPD 1 | wPD 2 | 6mPD 2 | Pre | mPD 1 | wPD 2 | 6mPD 2 | Pre | mPD 1 | wPD 2 | 6mPD 2 |
| Mean  | MC58     | 6   | 26  | 27  | 21   | 2   | 44    | 41    | 21     | 2   | 12    | 25    | 6      | 11  | 99    | 64    | 48     |
| SBA   | 6105     | 2   | 26  | 16  | 2    | 2   | 68    | 98    | 20     | 2   | 3     | 46    | 2      | 2   | 24    | 27    | 7      |
| titer | 4263     | 2   | 2   | 2   | 2    | 2   | 2     | 2     | 2.5    | 2   | 10    | 2     | 8      | 22  | 19    | 22    | 2      |

## 2.1 Supplementary Figures

A

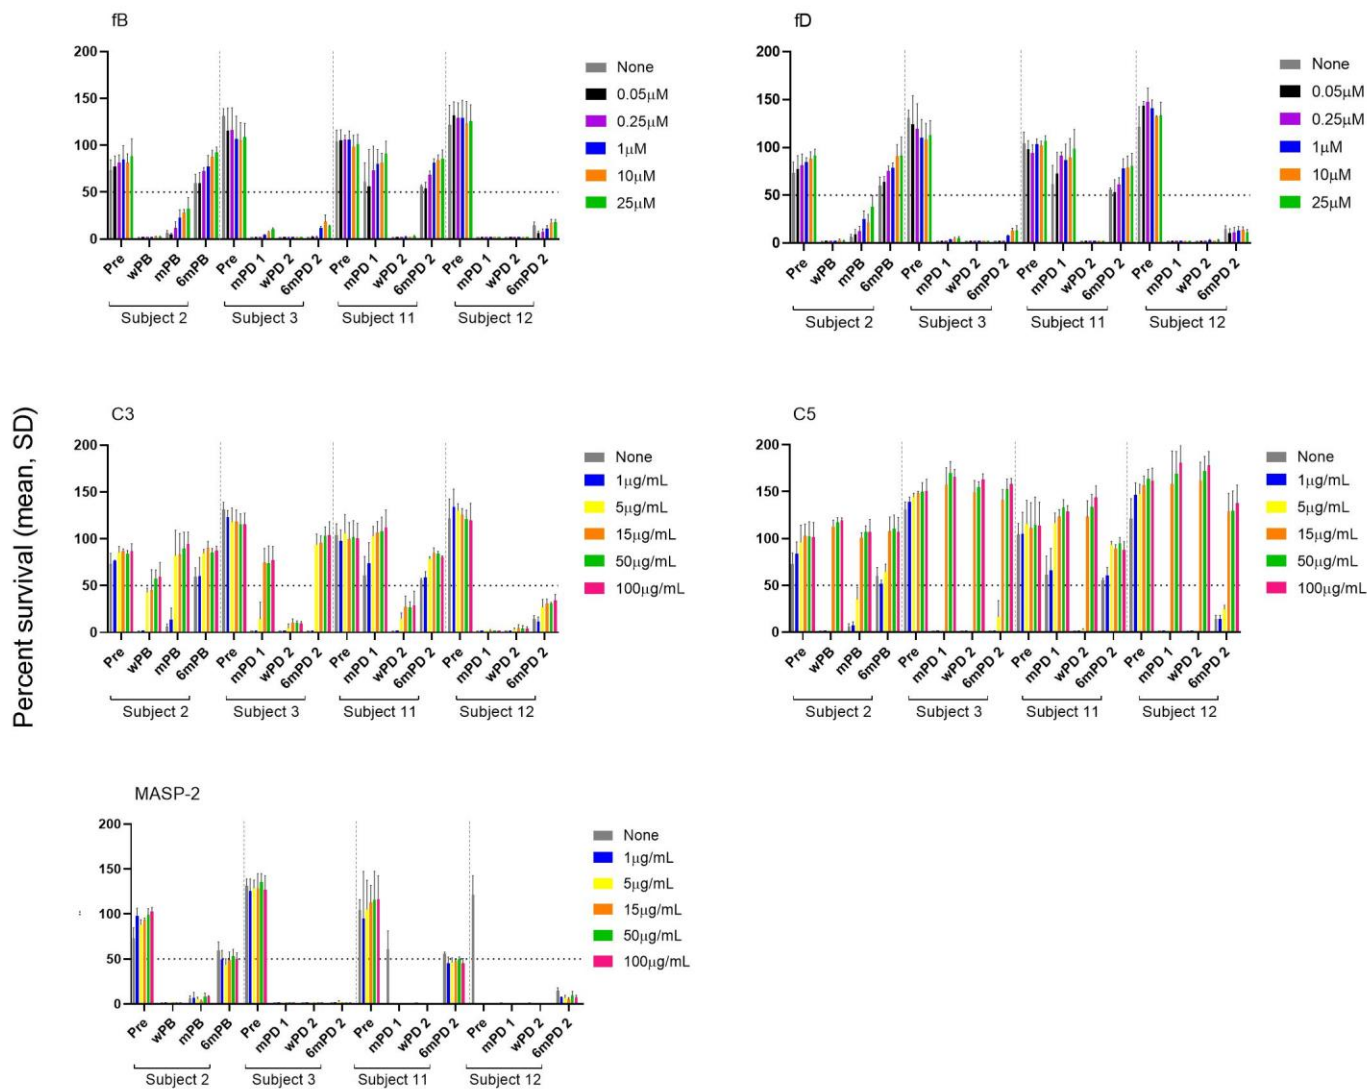

B

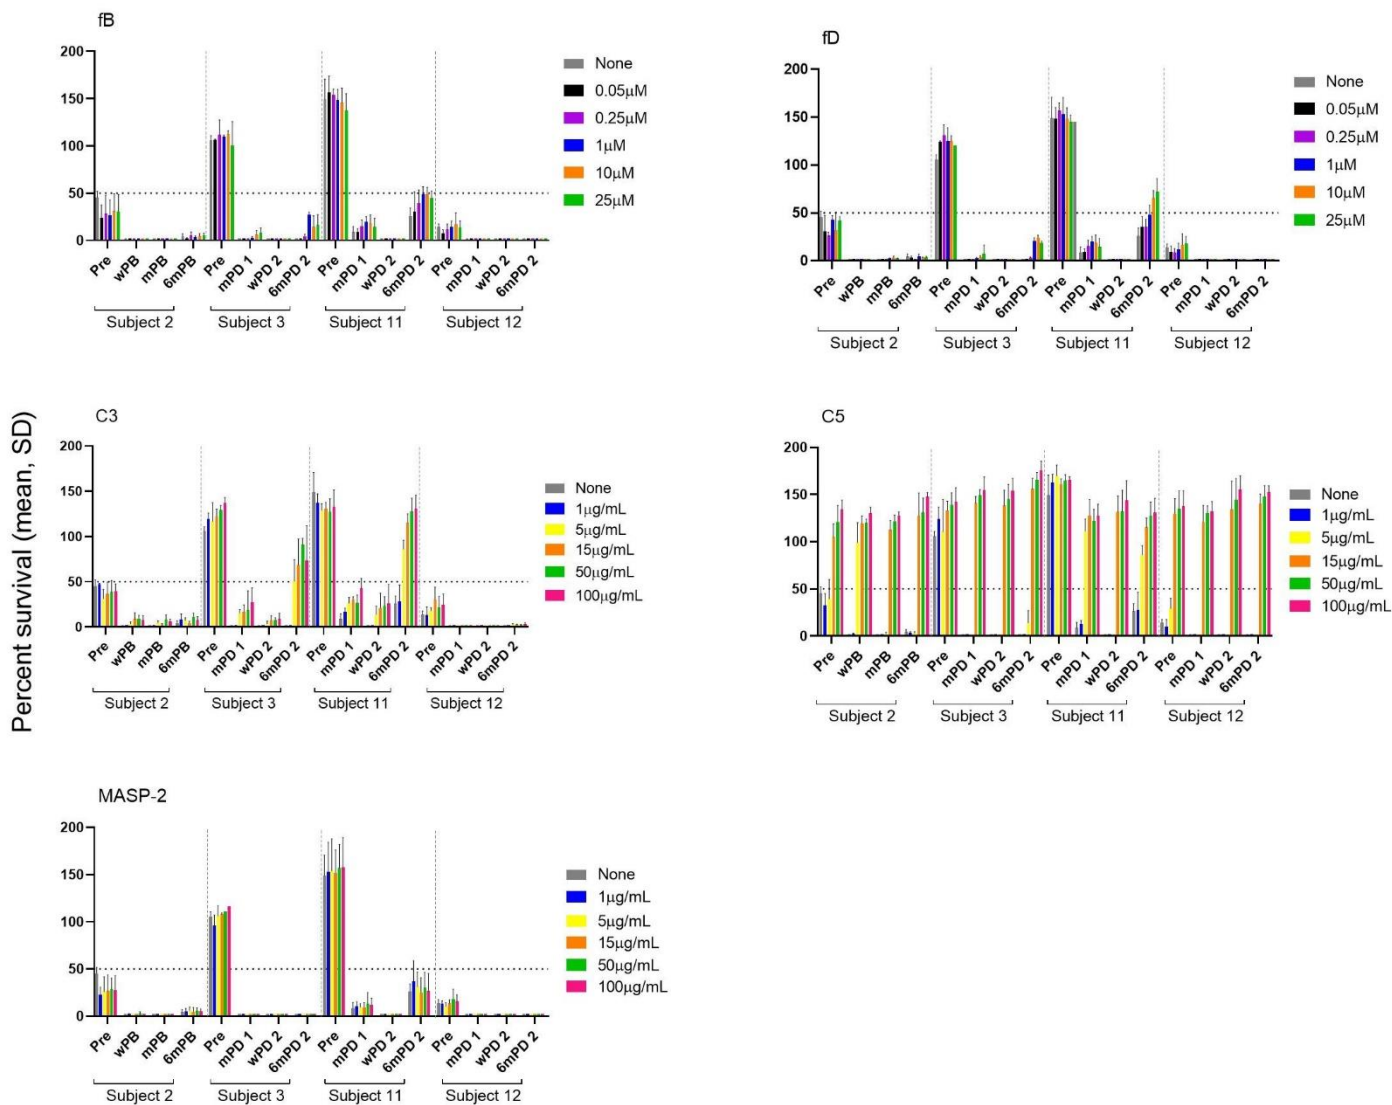

C

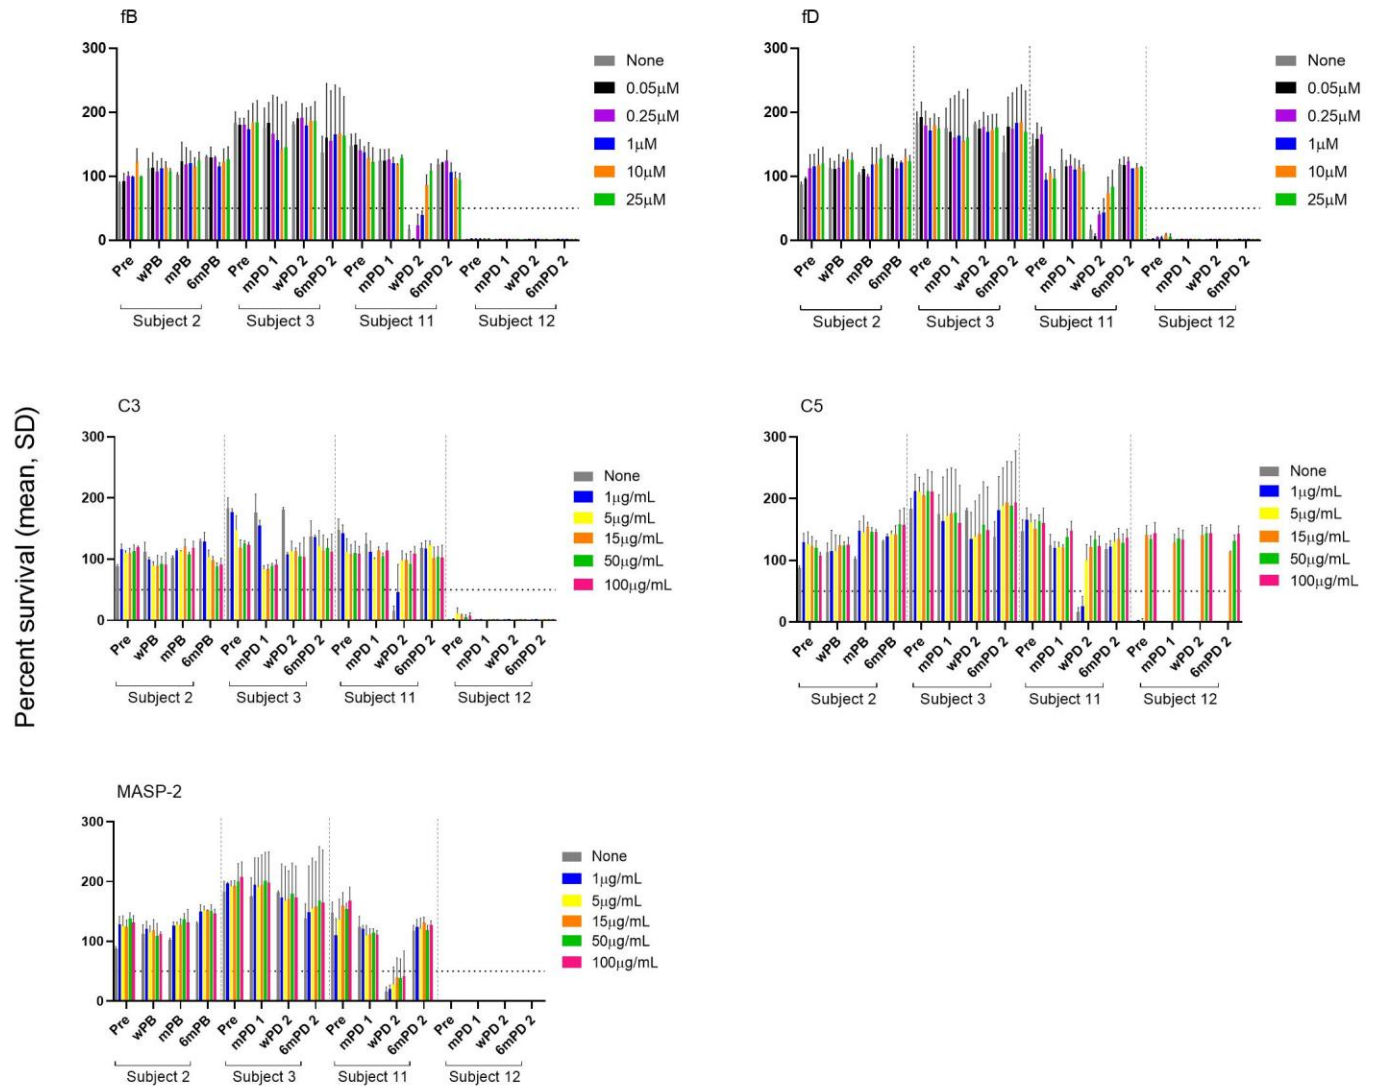

**Supplementary Figure 1. The effect of complement inhibitors on the survival of serogroup B case isolates in pre- and post- 4CMenB vaccination sera.** All subjects were vaccinated with the protein isolates 4CMenB. All sera samples for each subject were diluted 1:5 and assayed with the internal complement and against meningococcal B case isolates 6105 (A), MC58 (B) and 4263 (C). The horizontal dotted line represents 50% killing of bacteria after 60 minutes incubation with different concentrations of factor B (fB) inhibitor iptacopan, factor D (fD) inhibitor CMS487, C3 inhibitor (C3) CP-40, anti-C5 monoclonal antibody (mAb; C5) tesidolumab and anti-MASP-2 mAb (MASP-2) narsoplimab. For each graph, grey bars are test sera without added inhibitors. Data for each inhibitor are triplicate technical replicates. SD: standard deviation of mean. Abbreviations: pre vaccination serum sample (Pre), 2 weeks post booster (wPB), 2 months post-booster (mPB), 6 months post-booster (6mPB), 2 months post-dose 1 (mPD 1), 2 weeks post-dose 2 (wPD 2) and 6 months post-dose 2 (6mPD 2).

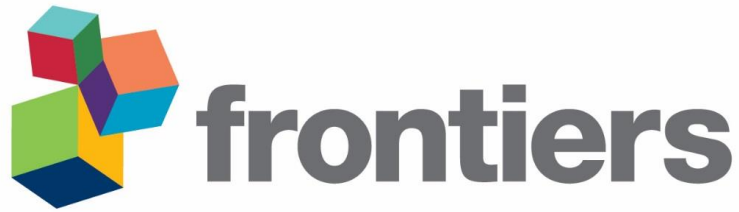

**Supplementary Figure 1.** The figure legends are required to have the same font as the main text, 12 point normal Times New Roman, single spaced. Please use a single paragraph for each legend and prepare the figures keeping in mind the PDF layout.
